# Supplementary material
Source: JCI journal article supplement (doi:10.1172/jci174235)
Supplement: sd1 [file 1]

## Supplemental Materials and Methods

### *Protein array profiling analysis.*

Mouse sera were collected, aliquoted, and stored at -80°C. Autoantigen microarrays were manufactured in the Microarray and Immune Phenotyping Core Facility of University of Texas Southwestern Medical Center and analyzed as previously described (1).

### *Cell proliferation assay with IL-2 rescue*

Cells were incubated with or without the addition of 100 ng/ml IL-2 (R&D Systems, Inc) to the stimulation. All other steps follow the previously described cell proliferation assay.

### *Treg Suppression Assay*

Splenocytes were isolated and RBC lysed as described previously. CD4<sup>+</sup>CD25<sup>+</sup> Treg cells and CD4<sup>+</sup>CD25<sup>-</sup> T effector (Teff) cells were enriched by magnetic bead purification using the CD4<sup>+</sup>CD25<sup>+</sup> Regulatory T Cell Isolation Kit (Miltenyi Biotec). Purified Teff cells were incubated with 5mM of CFDA Vybrant™ CFDA SE Cell Tracer Kit (Thermo Fischer Scientific, Maltham, MA). Treg cells and labeled Teff cells were plated in a 96 well plate at 0:1, 1:1, and 2:1 dilutions and stimulated with Mouse T-Activator Dynabeads (Thermo) at a 1:5 bead:cell ratio for 72 hours. Teff proliferation was measured using flow cytometry.

### *Mice*

Nur77-GFP reporter mice (*Nur77<sup>GFP</sup>*) (B6N.B6-Tg(Nr4a1-EGFP/cre)820Khog/J) were supplied by the Zikherman laboratory (Zikherman *et. al*, 2012; Moran *et al.*, 2011 ). *Hem1<sup>fl/fl</sup>pLCKcre*

mice were bred to *Nur77<sup>GFP</sup>* mice to create a reporter mouse where TCR signaling induces expression of GFP as a reporter for TCR signal strength (Moran *et al.*, 2011).

## Supplemental Figures

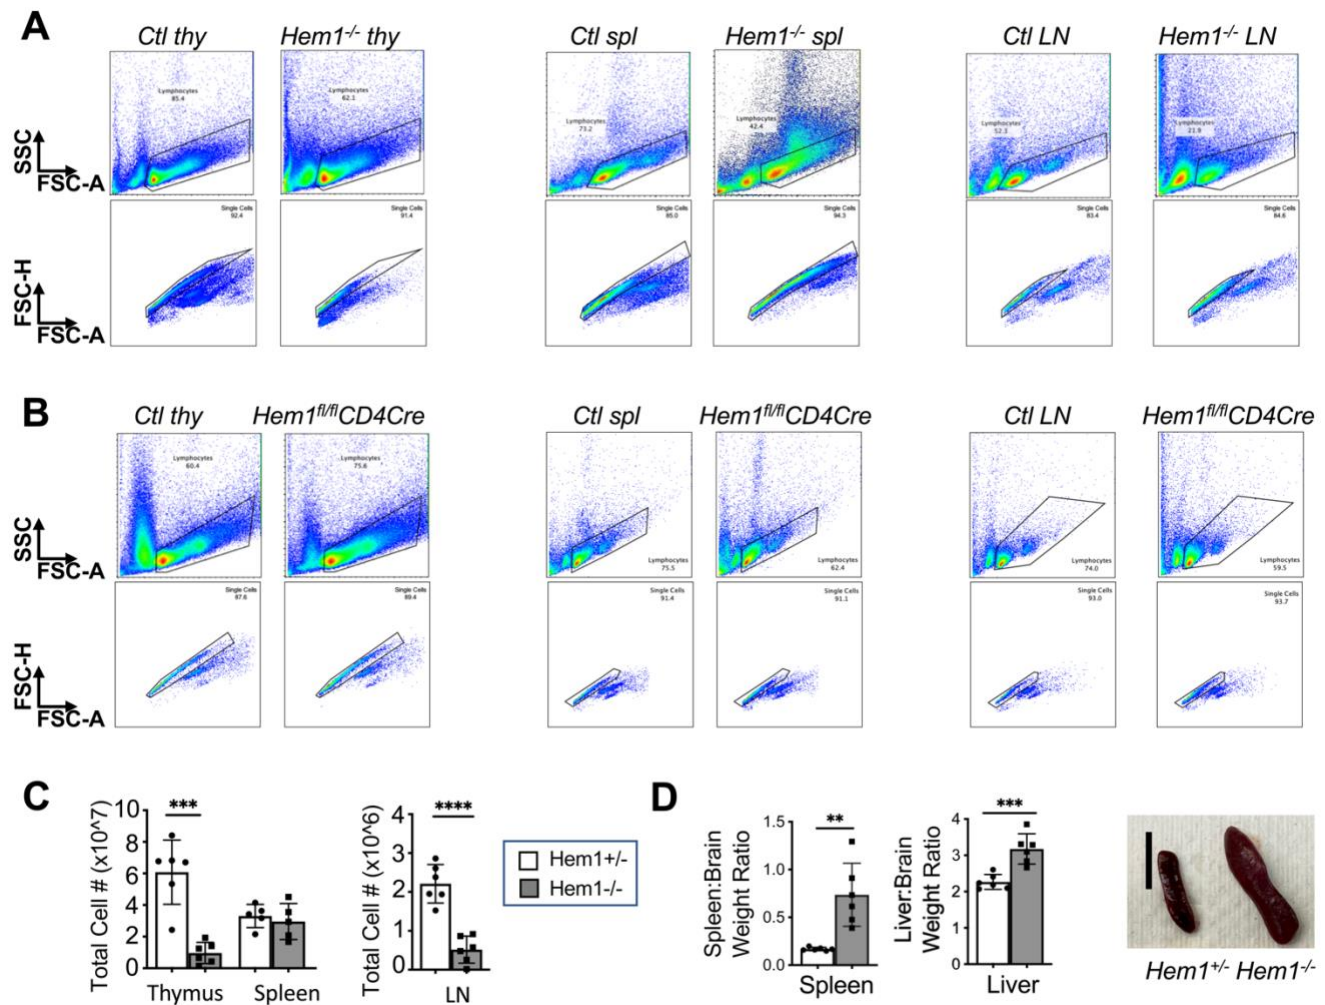

### Supplemental Figure 1. Constitutive disruption of *Hem1* results in decreased cellularity in the thymus and peripheral lymph nodes and hepatosplenomegaly.

Total thymocytes, splenocytes, and cells from the axillary and inguinal lymph nodes were collected. **(A)** Representative flow cytometric dot plots showing lymphocyte gating strategy on Side Light Scatter (SSC) versus Forward Light Scatter (FSC-A) and single cell gating on FSC Height (FSC-H) versus FSC-A for *Hem1<sup>-/-</sup>* mice and *Hem<sup>+/-</sup>* littermate controls. **(B)** Representative flow cytometric dot plots for *Hem1<sup>fl/fl</sup>CD4Cre* mice and *Hem1<sup>fl/fl</sup>* littermate controls. **(C)** Bar graphs represent the total cellularity in each organ specified harvested from *Hem1<sup>-/-</sup>* mice and *Hem<sup>+/-</sup>* littermate controls. Cell counts were calculated using Countbright absolute counting beads by flow cytometry. **(D)** Representative image of spleens harvested from *Hem<sup>+/-</sup>* control (left) and *Hem1<sup>-/-</sup>* (right) mice. Scale bar represents 1cm. 11–16-week-old mice, n=6/group, each data point represents an individual mouse. Bar graphs represent mean  $\pm$  SD and were analyzed via unpaired Student's t test. \*\* $P < 0.01$ , \*\*\* $P < 0.001$ , \*\*\*\* $P < 0.0001$ . Ctl = control; Thy = thymus; Spl = spleen; LN = lymph node

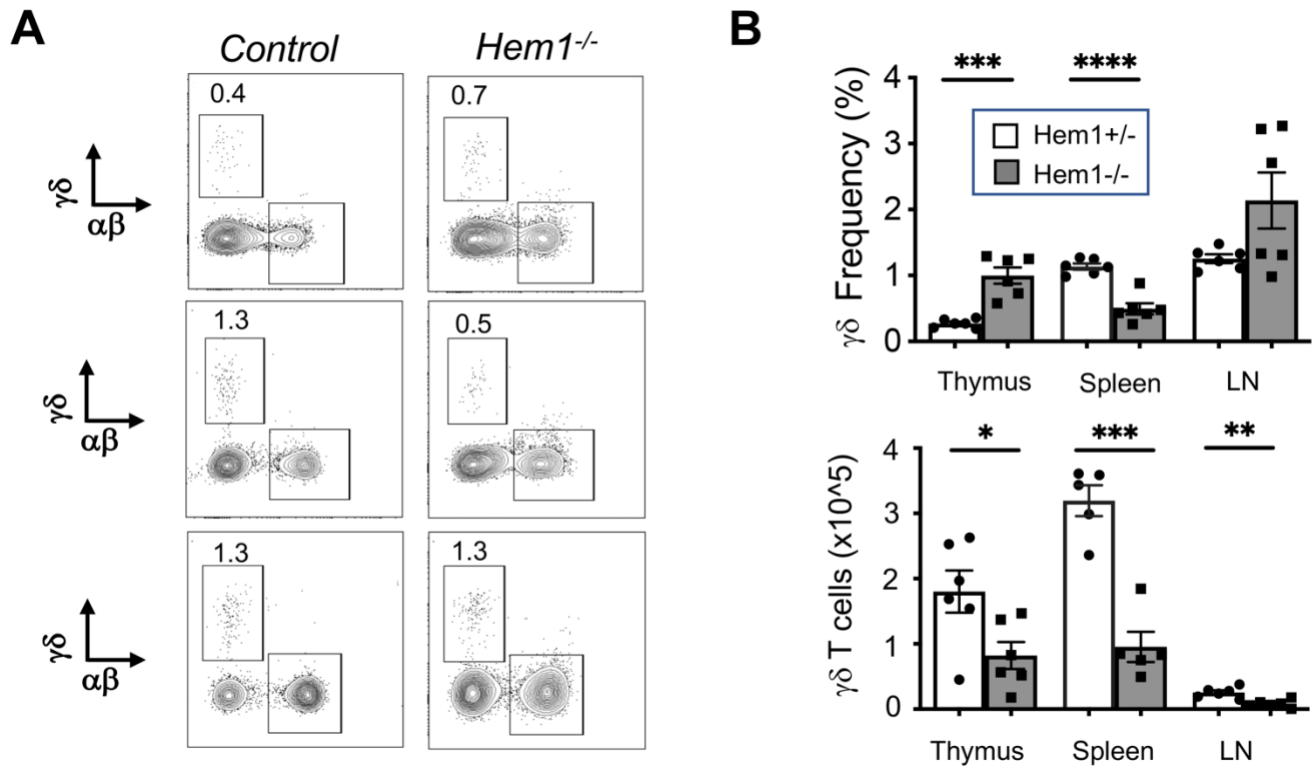

**Supplemental Figure 2. Constitutive disruption of *Hem1* results in decreased numbers of  $\gamma\delta$  T cells.**

Total thymocytes, splenocytes, and cells from the axillary and inguinal lymph nodes were collected from *Hem1*<sup>-/-</sup> mice and *Hem*<sup>+/-</sup> littermate controls and analyzed by flow cytometry. **(A)** Representative contour plots for  $\gamma\delta$  and  $\alpha\beta$  T cells. Cells were first gated on lymphocytes and single cells. **(B)** Bar graphs and quantification of  $\gamma\delta$  T cells. 11-16-week-old mice, n=6/group, each data point represents an individual mouse. Bar graphs represent mean  $\pm$  SD and were analyzed via unpaired Student's t test. \**P* < 0.05, \*\**P* < 0.01, \*\*\**P* < 0.001, \*\*\*\**P* < 0.0001.

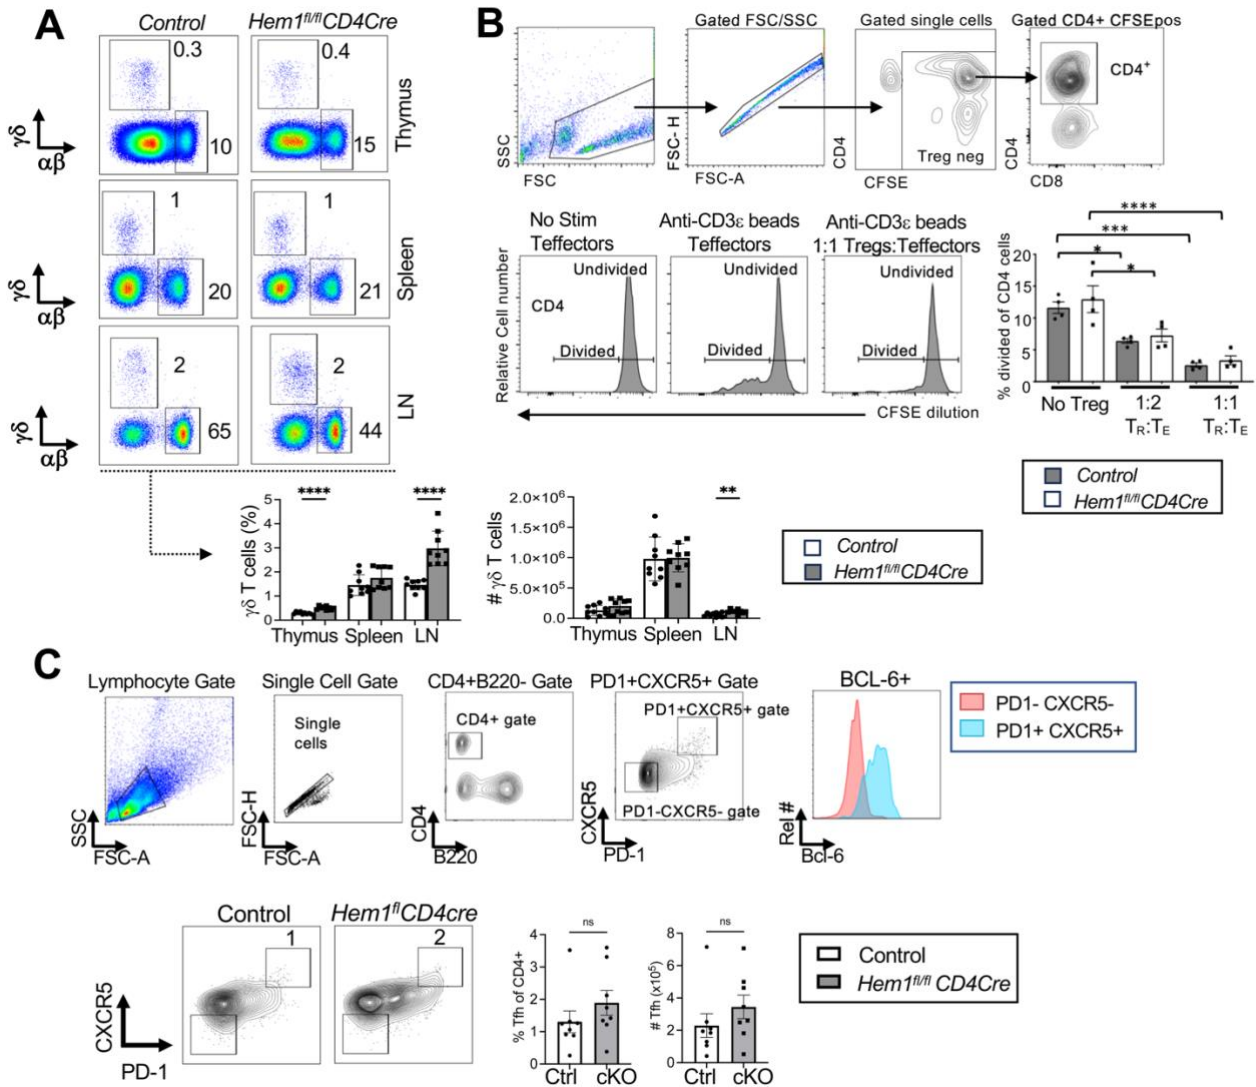

**Supplemental Figure 3. T cell-specific deletion of *Hem1* results in increased frequency of  $\gamma\delta$  T cells, functional regulatory T cells, and normal LN frequency of T Follicular Helper cells.** Total thymocytes, splenocytes, and cells from the axillary and inguinal LNs were harvested from *Hem1<sup>fl/fl</sup>CD4Cre* mice and *Hem1<sup>fl/fl</sup>* littermate controls and analyzed by flow cytometry. **(A)** Representative flow cytometric dot plots for  $\gamma\delta$  and  $\alpha\beta$  T cells. Cells were first gated on lymphocytes. Bar graphs show quantification of  $\gamma\delta$  T cells. 10-12-week-old mice, n=6-9/group. **(B)** Purified CD4<sup>+</sup>CD25<sup>+</sup> Tregs (T<sub>R</sub>) from *Hem1<sup>fl/fl</sup>CD4Cre* or *Hem1<sup>fl/fl</sup>* control mice were mixed with CFSE labeled CD4<sup>+</sup>CD25<sup>-</sup> T effectors (T<sub>E</sub>) from *Hem1<sup>fl/fl</sup>* mice at ratios of either no Tregs, 1:1 T<sub>R</sub>:T<sub>E</sub>, or 1:2 T<sub>R</sub>:T<sub>E</sub>. T<sub>E</sub> were stimulated with CD3/CD28 coated beads for 72 hrs and then harvested and stained for flow cytometric analyses. (*top*) Representative flow cytometric dot plots and histograms with gating strategy to look at cell division of CD4<sup>+</sup>CD25<sup>-</sup> T cells. (*bottom*) Percentage of divided CD4 T<sub>E</sub> cells in the presence or absence of Tregs. **(C)** Representative flow cytometric dot plots and histograms with gating strategy for T follicular helper cells. Bar graphs show quantification of Tfh cells (CD4<sup>+</sup>CXCR5<sup>+</sup>PD-1<sup>+</sup>). 10-40-week-old mice, n=8/group. Each data point represents an individual mouse. Bar graphs represent mean  $\pm$  SEM and were analyzed via ANOVA with multiple comparisons (B), or unpaired Student's t test (A and C). \**P* < 0.05, \*\*\**P* < 0.001, \*\*\*\**P* < 0.0001. T<sub>R</sub> = T regulatory; T<sub>E</sub> = T effector; Tfh = T follicular helper; Rel = relative; CTL = control; cKO = conditional knockout.

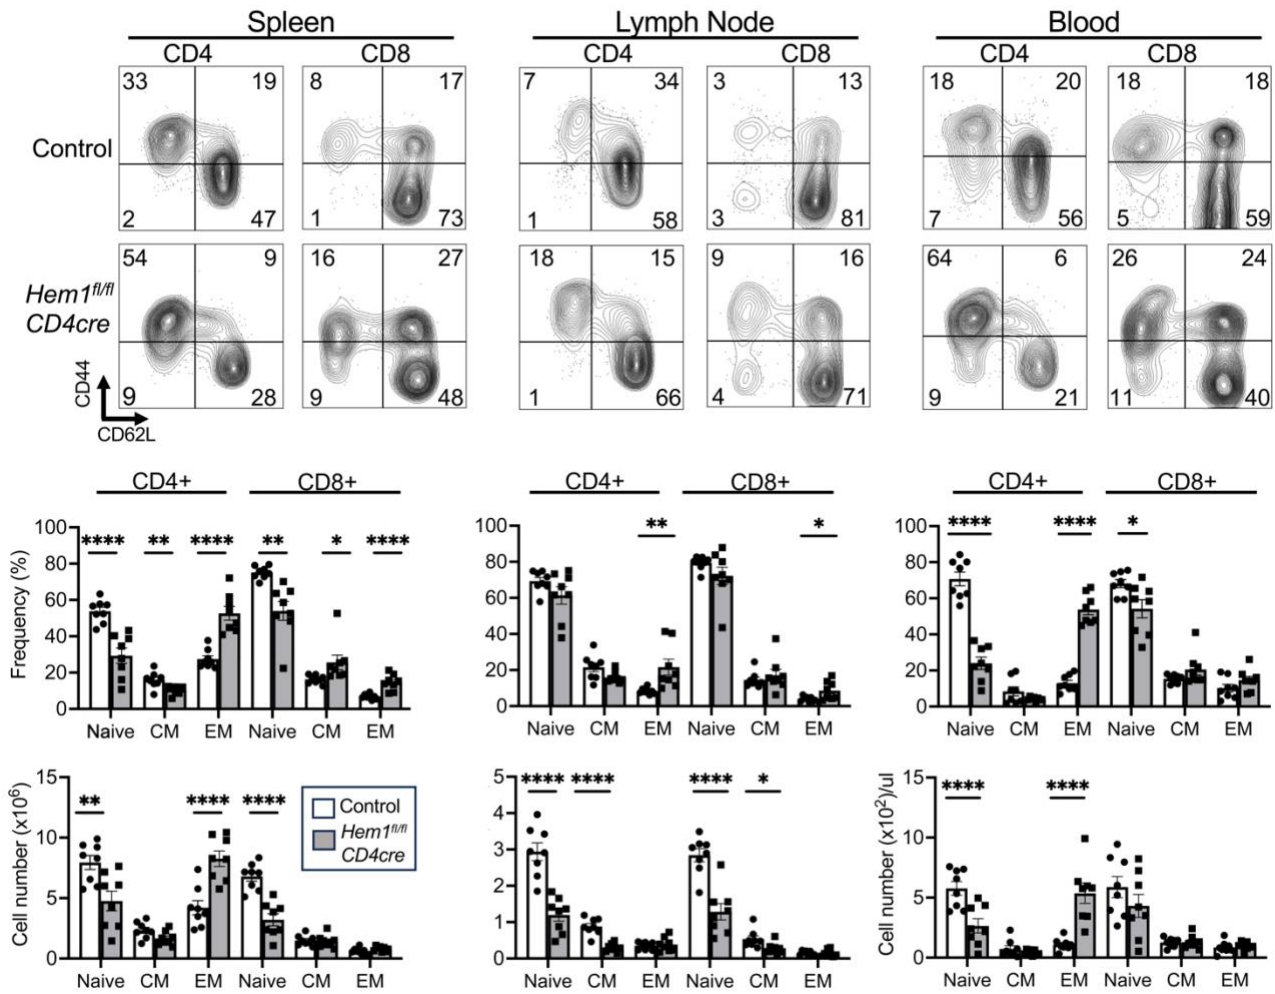

**Supplemental Figure 4. T cell-specific disruption of *Hem1* results in decreased frequency of naive T cells with concurrent increase in effector memory T cells.**

Total splenocytes and cells from axillary and inguinal lymph nodes were isolated from *Hem1<sup>fl/fl</sup>CD4Cre* mice and *Hem1<sup>fl/fl</sup>* littermate controls. **(A)** Representative flow cytometric dot plots of splenocytes. Cells were first gated on lymphocytes, and then CD4<sup>+</sup> and CD8<sup>+</sup> cells (Figure 4B and C). Bar graphs and quantification of naive (CD44<sup>-</sup>CD62L<sup>+</sup>), central memory (CD44<sup>+</sup>CD62L<sup>+</sup>), and effector memory (CD44<sup>+</sup>CD62L<sup>-</sup>) T cells from splenocytes. **(B)** Representative contour plots and bar graphs of T cells harvested from lymph nodes, and peripheral blood **(C)**. 10–40-week-old mice, n=7-8/group, each data point represents an individual mouse. Data are representative of 2 or more independent experiments. Bar graphs represent mean ± SEM and were analyzed via unpaired Student's t test. \**P* < 0.05, \*\**P* < 0.01, \*\*\**P* < 0.001, \*\*\*\**P* < 0.0001. CM = central memory; EM = effector memory. CM = central memory.

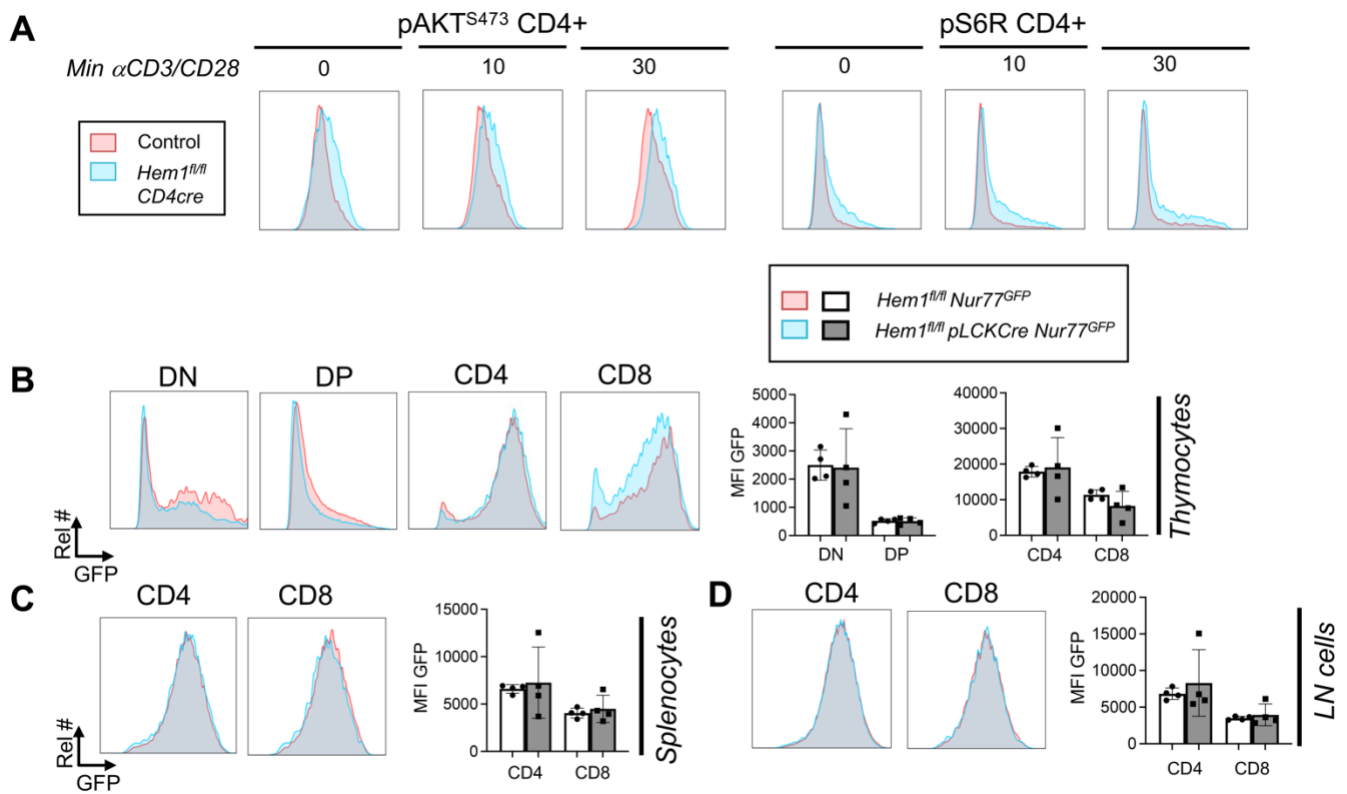

**Supplemental Figure 5. T cell-specific deletion of *Hem1* results in increased mTOR signaling in CD4<sup>+</sup> T cells but no observed change in upstream TCR signal strength.**

**(A)** Representative flow cytometric histograms of phospho-AKT(Ser<sup>473</sup>) and phospho-S6R(Ser<sup>235/236</sup>) levels in CD4<sup>+</sup> T cells over 0, 10, and 30 minutes of stimulation with anti-CD3/anti-CD28 antibodies (Figure 8). Cells first gated on FSC/SSC lymphocytes, FSC-H/FSC-A single cells, and CD4<sup>+</sup> T cells. 32-33-week-old mice, n=4/group. **(B-D)** Total thymocytes, splenocytes, and cells from axillary and inguinal lymph nodes were collected from *Hem1<sup>fl/fl</sup>pLCKCreNur77<sup>GFP</sup>* mice and *Hem1<sup>fl/fl</sup>Nur77<sup>GFP</sup>* littermate controls. Representative flow cytometric histograms of GFP expression and bar graphs of MFI of GFP. Cells first gated on lymphocytes and single cells. Thymocyte expression of GFP gated on double negative (DN), double positive (DP), CD4<sup>+</sup>CD8<sup>-</sup> (CD4), and CD8<sup>+</sup>CD4<sup>-</sup> (CD8) cells in the thymus (B). Expression of GFP gated on CD4<sup>+</sup> and CD8<sup>+</sup> T cells in the spleen (C) and peripheral lymph nodes (D). 9-14-week-old mice, n= 4/group, each data point represents an individual mouse. Bar graphs represent mean  $\pm$  SD and were analyzed via unpaired Student's t test. Rel = relative.

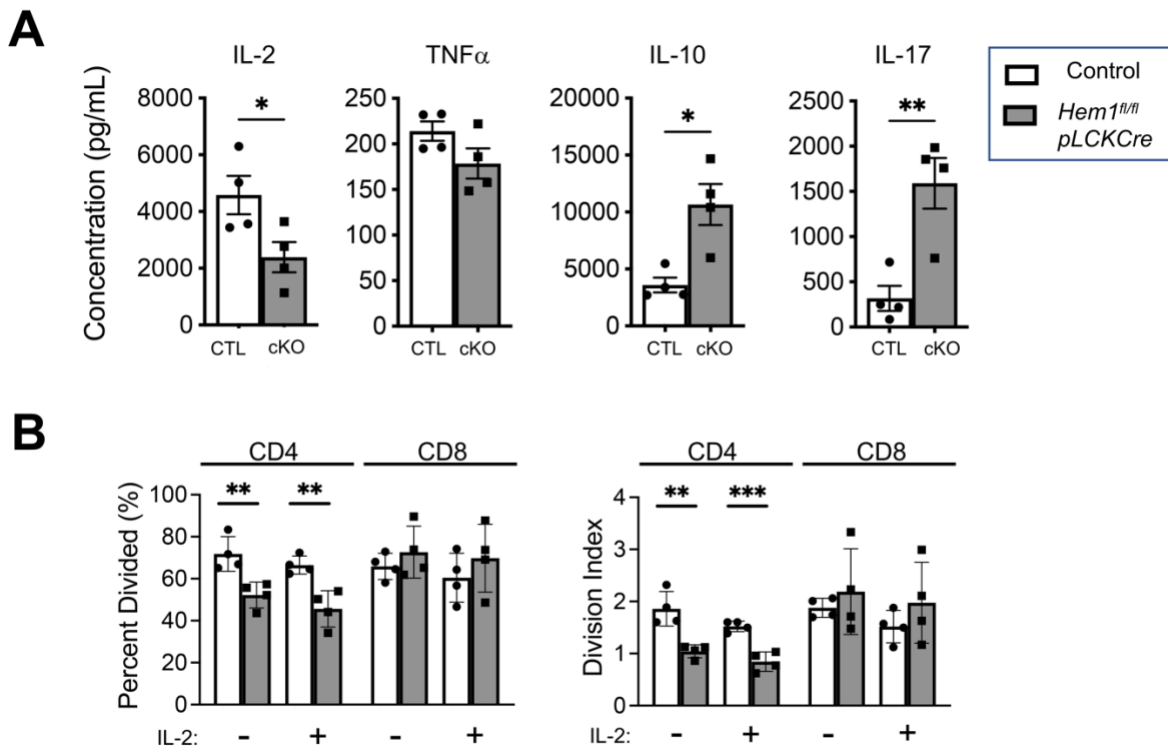

**Supplemental Figure 6. T cell-specific deletion of *Hem1* results in altered cytokine production, and decreased cell proliferation is independent of decreased IL-2 levels.**

**(A)** Purified T cells from 10-12-week-old *Hem1<sup>fl/fl</sup>pLCKCre* mice and *Hem1<sup>fl/fl</sup>* littermate controls were stimulated with anti-CD3 and anti-CD28 antibodies for 72 hours. Concentrations of cytokines in supernatant were measured by multiplex immunoassay. **(B)** Purified T cells from 39-43-week-old *Hem1<sup>fl/fl</sup>pLCKCre* mice and *Hem1<sup>fl/fl</sup>* littermate controls were stimulated with anti-CD3 and anti-CD28 antibodies with or without IL-2 supplementation (100ng/ml) for 72h. Proliferation was assessed with CFSE, and bar graphs represent the percent of cells that had undergone division. Each data point represents an individual mouse, n=4/group. Bar graphs represent mean  $\pm$  SD and were analyzed via unpaired Student's t test. \* $P < 0.05$ , \*\* $P < 0.01$ , \*\*\* $P < 0.001$ . Rel = relative.

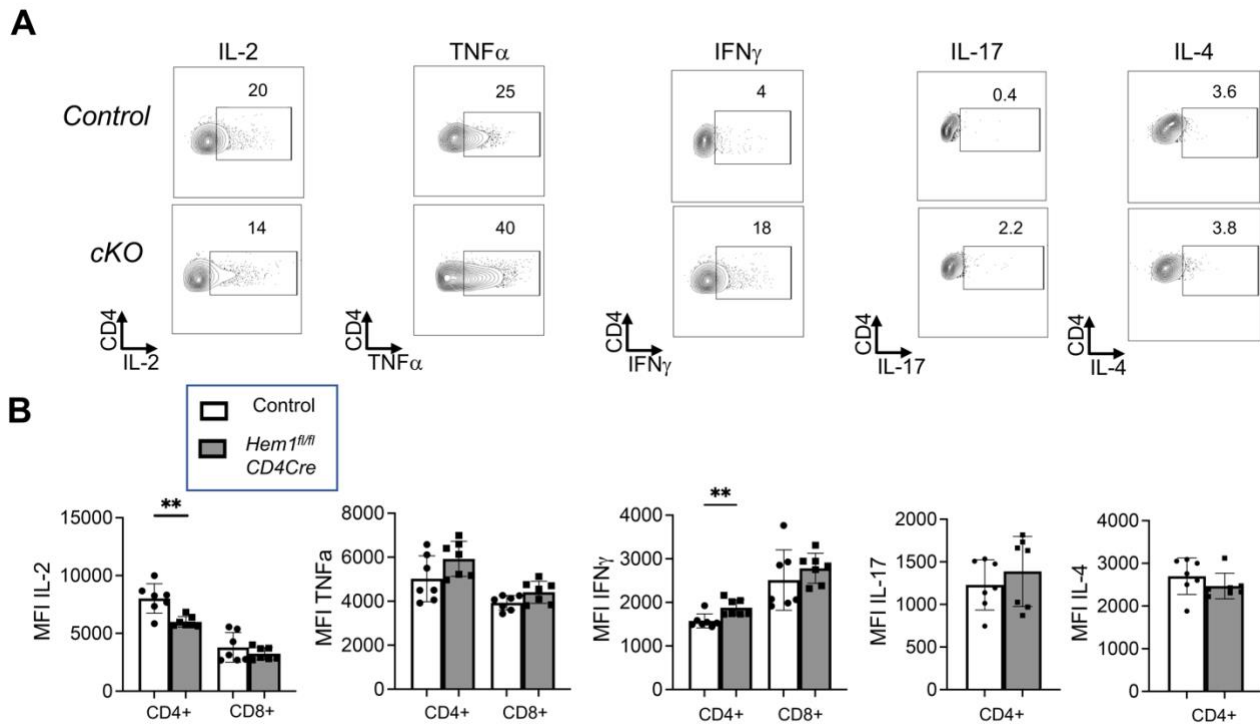

**Supplemental Figure 7. T cell-specific deletion of *Hem1* results in altered cytokine production.**

Purified T cells from splenocytes harvested from *Hem1<sup>fl/fl</sup>CD4Cre* mice and *Hem1<sup>fl/fl</sup>* littermate controls were stimulated with anti-CD3 and anti-CD28 antibodies for 72h followed by PMA and ionomycin stimulation for 5h. **(A)** Representative flow cytometric histograms of intracellular staining of the indicated cytokines. Cells first gated on lymphocytes, single cells, live cells, and CD4<sup>+</sup> cells. **(B)** Bar graphs represent MFI of indicated cytokines in CD4<sup>+</sup> and CD8<sup>+</sup> T cells. 11-15-week-old mice, n=7/group. Data representative of 2 or more independent experiments, each dot represents an individual mouse. Bar graphs represent mean  $\pm$  SD and were analyzed via unpaired Student's t test. \* $P < 0.05$ , \*\* $P < 0.01$ , \*\*\* $P < 0.001$ .

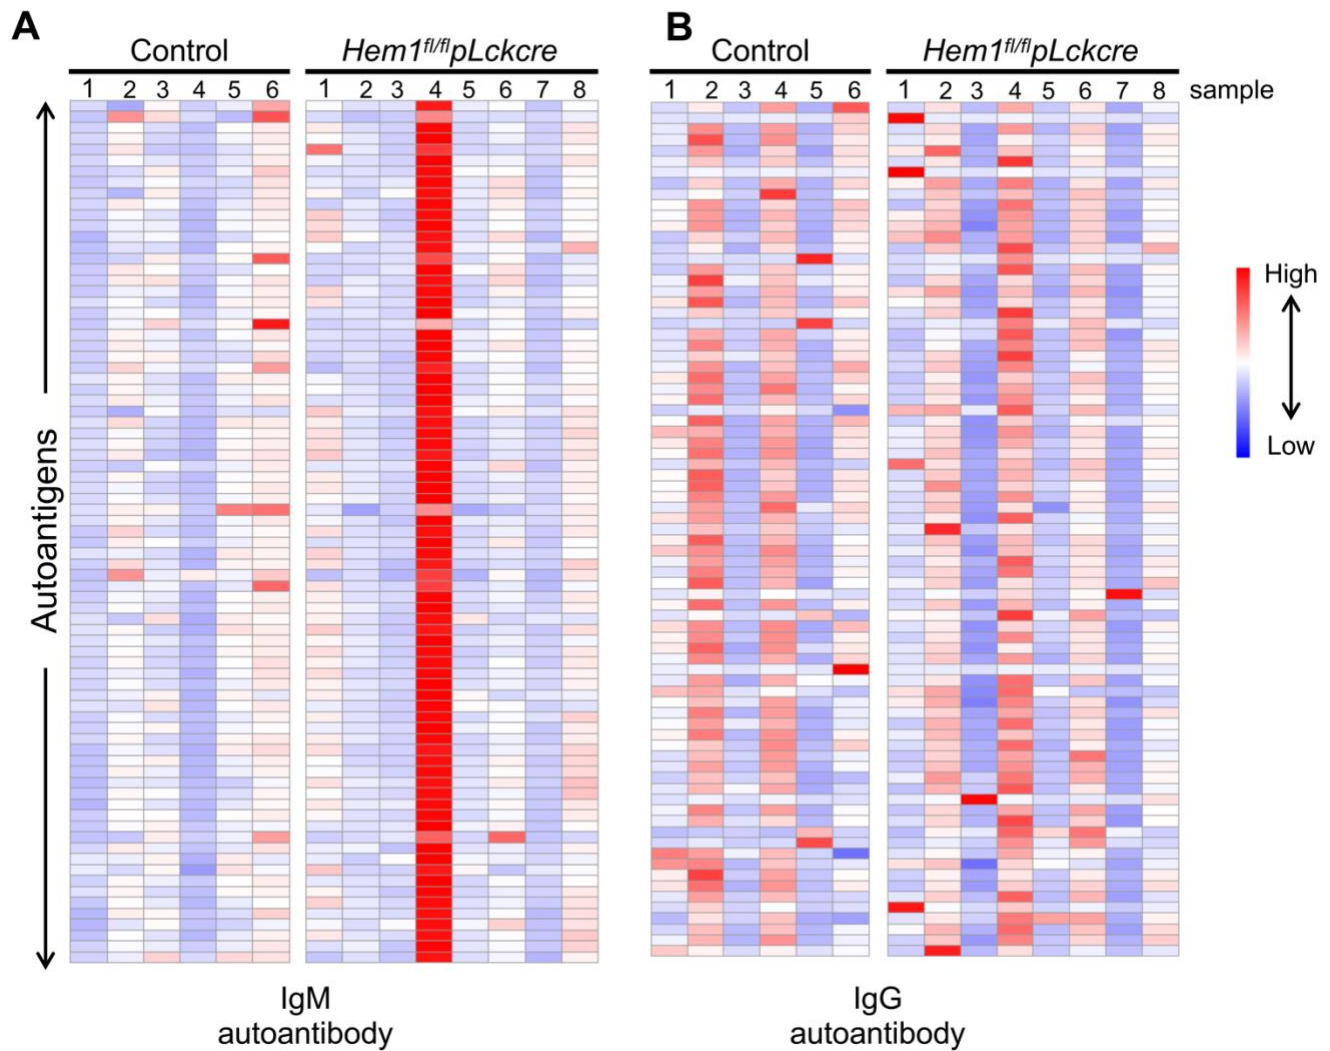

**Supplemental Figure 8. T cell specific disruption of Hem1 does not result in increased autoantibody formation**

Sera were collected from female  $Hem1^{fl/fl}pLckCre$  and control mice ages 49–56 weeks (n=6-8/group). Sera were then hybridized to an autoantigen microarray containing 128 antigens. Heatmaps depict antigen reactivity (antibody score) for **(A)** IgM and **(B)** IgG.

**Supplemental Table 1. Comparison of T cell populations in human and mouse models of *Hem1* deficiency**

|                        | <b>Human PID</b>                  | <b>Hem1<sup>-/-</sup></b> | <b>Hem1<sup>fl/fl</sup>pLckCre</b> | <b>Hem1<sup>fl/fl</sup>CD4Cre</b> |
|------------------------|-----------------------------------|---------------------------|------------------------------------|-----------------------------------|
| CD4                    | ↓ Low (Castro)                    | ↓ Low                     | LN: ↓ Low (%)                      | LN, Spl: ↓ Low                    |
| CD8                    | ↑ High (Castro)                   | ↑ High (%), ↓ Low (#)     | Spleen: ↓ Low (%)                  | LN, Spl: ↓ Low                    |
| $\alpha\beta$ T cells  | n/a                               | ↓ Low                     | ↓ Low (%)                          | ↓ Low                             |
| $\gamma\delta$ T cells | ↑ High (Salzer)                   | ↓ Low                     | ↑ High (%)                         | ↑ High (%)                        |
| Treg                   | ↓ Low (Castro)<br>Normal (Cook)   | ↑ High (%)                | ↑ High (%)                         | ↑ High (%)                        |
| Naive T cells          |                                   |                           |                                    |                                   |
| CD4                    | ↓ Low (Cook, Castro, Salzer)      | ↓ Low                     | ↓ Low                              | ↓ Low                             |
| CD8                    | ↓ Low (Cook, Castro, Salzer)      | ↓ Low                     | ↓ Low                              | ↓ Low                             |
| EM T cells             |                                   |                           |                                    |                                   |
| CD4                    | ↑ High (Castro, Salzer)           | ↑ High                    | ↑ High                             | ↑ High                            |
| CD8                    | ↑ Normal to high (Castro, Salzer) | ↑ High                    | No difference                      | ↑ High                            |
| Hepato-splenomegaly    | Yes (Cook, Castro, Salzer)        | Yes                       | No                                 | No                                |
| Liver mineralization   | Yes (Cook)                        | Yes                       | n/a                                | n/a                               |

EM = effector memory

**Supplemental Table 2. Comparison of T cell activation and effector function in human and mouse models of T cell specific *Hem1* deficiency**

|                              | <b>Human PID</b>                               | <b>Mouse cKO model</b> |
|------------------------------|------------------------------------------------|------------------------|
| CD69 expression              | ↓ Low (Castro, Cook, Salzer)                   | ↓ Low (CD4, CD8)       |
| CD25 expression              | ↓ Low (Castro, Cook, Salzer)                   | ↓ Low (CD4, CD8)       |
| Proliferation                | ↓ Low (Cook, Salzer)<br>No difference (Castro) | ↓ Low (CD4, CD8)       |
| Exhaustion marker expression | ↑ High (Castro, Salzer)                        | ↑ High                 |
| IS formation                 | ↓ Low (Cook, Castro)                           | ↓ Low                  |
| <b>Cytokines</b>             |                                                |                        |
| IL-2                         | ↓ Low (Cook)                                   | ↓ Low                  |
| IL-4                         | n/a                                            | No difference          |
| IL-10                        | ↑ High (Castro)                                | ↑ High                 |
| IL-17                        | n/a                                            | ↑ High                 |
| IFN $\gamma$                 | ↑ High (Castro)                                | ↑ High                 |
| TNF $\alpha$                 | ↓ Low (Cook)                                   | ↑ High                 |
| mTORC2 signaling             | ↓ Low (Cook, Salzer)                           | ↑ High                 |

cKO = conditional knockout

1. Avalos A, Tietsort JT, Suwankitwat N, Woods JD, Jackson SW, Christodoulou A, et al. Hem-1 regulates protective humoral immunity and limits autoantibody production in a B cell-specific manner. *JCI Insight*. 2022;7(9).
